# Supplementary material for: A redesign of light-driven rotary molecular motors
Source: Royal Society of Chemistry journal article supplement (doi:10.1039/b715652a), 2007-12-13
Supplement: b715652a.pdf [file b715652a.pdf]

# A redesign of light-driven rotary molecular motors

Michael M. Pollard,<sup>a</sup> Auke Meetsma,<sup>b</sup> and Ben L. Feringa<sup>a\*</sup>

## Electronic Supplementary Information

|                                                                                                                 |    |
|-----------------------------------------------------------------------------------------------------------------|----|
| <sup>1</sup> H and <sup>13</sup> C NMR spectra for stable <i>cis</i> -3 .....                                   | 1  |
| <sup>1</sup> H and <sup>13</sup> C NMR spectra for stable <i>trans</i> -3 .....                                 | 4  |
| <sup>1</sup> H and <sup>13</sup> C NMR spectra for stable 6 .....                                               | 6  |
| <sup>1</sup> H NMR spectra for PSS <sub>313nm</sub> of stable <i>cis</i> -3 and unstable <i>trans</i> -3 .....  | 8  |
| <sup>1</sup> H NMR spectra for PSS <sub>313 nm</sub> of stable <i>trans</i> -3 and unstable <i>cis</i> -3 ..... | 9  |
| <sup>1</sup> H NMR (500 MHz) spectra for PSS <sub>365nm</sub> containing stable 6 and unstable 6 .....          | 11 |

### <sup>1</sup>H and <sup>13</sup>C NMR spectra for stable *cis*-3

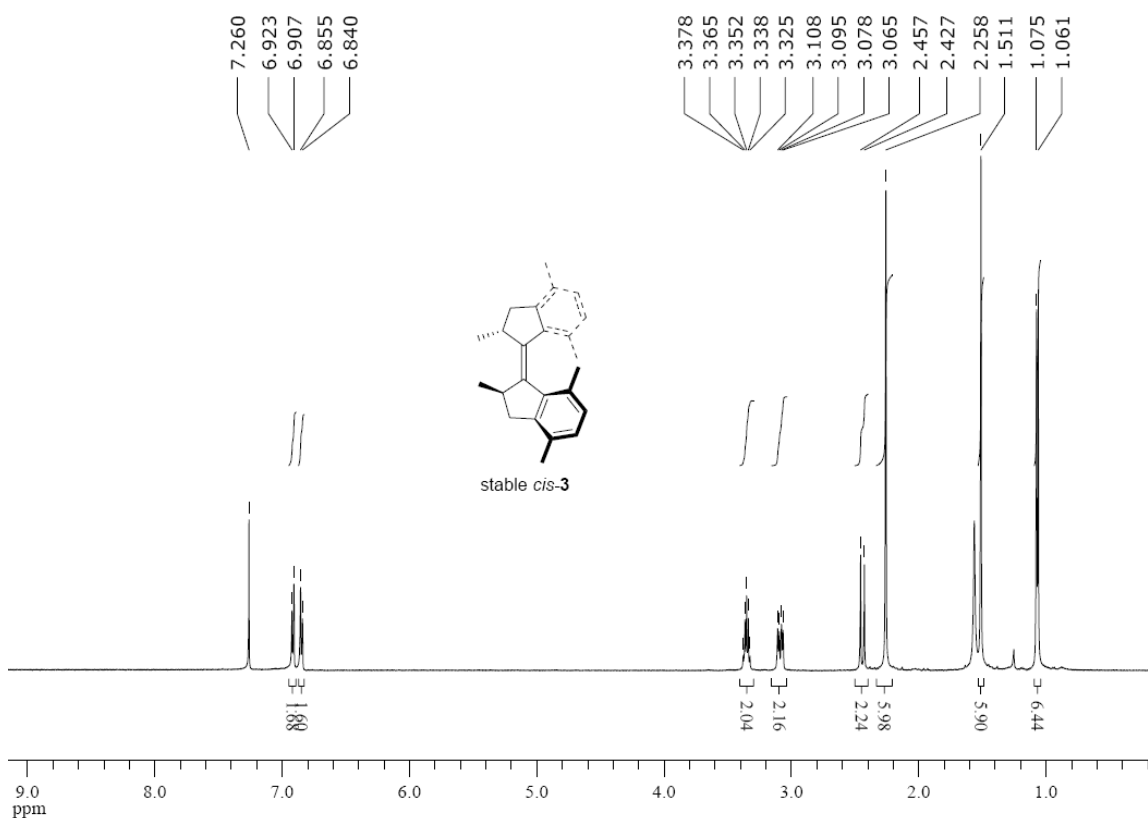

Figure 1. 500 MHz <sup>1</sup>H NMR spectrum of stable *cis*-3 in CDCl<sub>3</sub>.

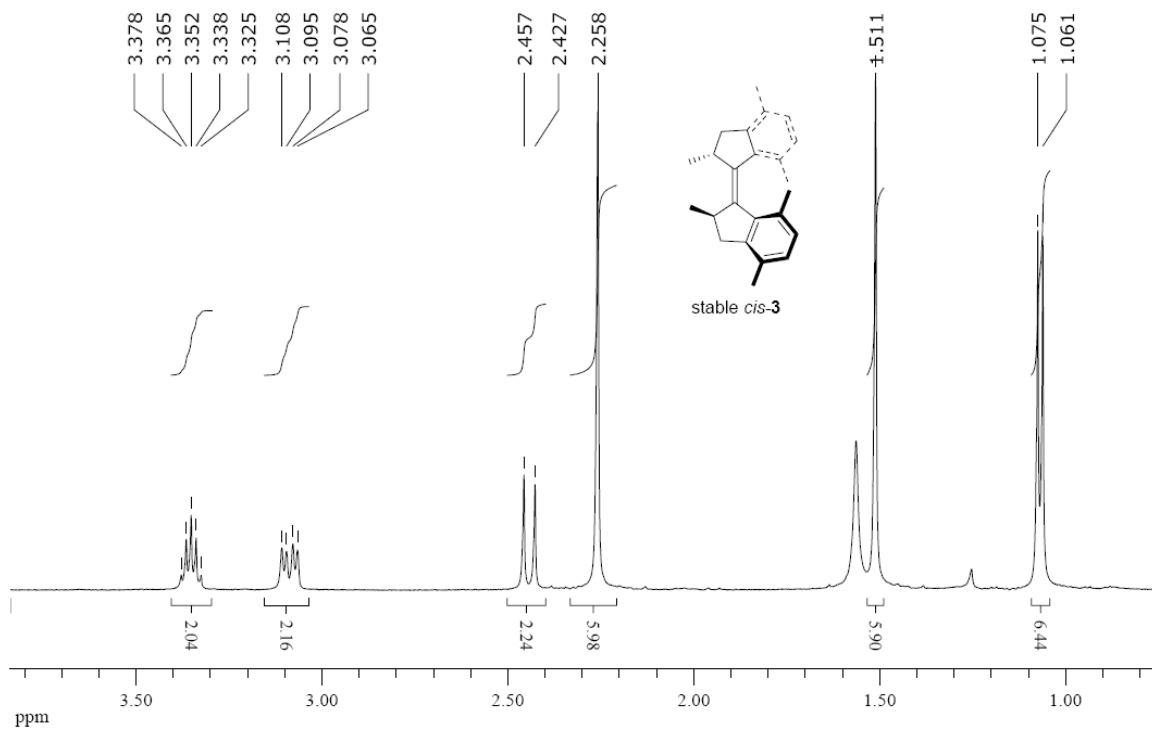

**Figure 2.** 500 MHz  $^1\text{H}$  NMR spectrum (expansion) of *stable cis-3* in  $\text{CDCl}_3$ .

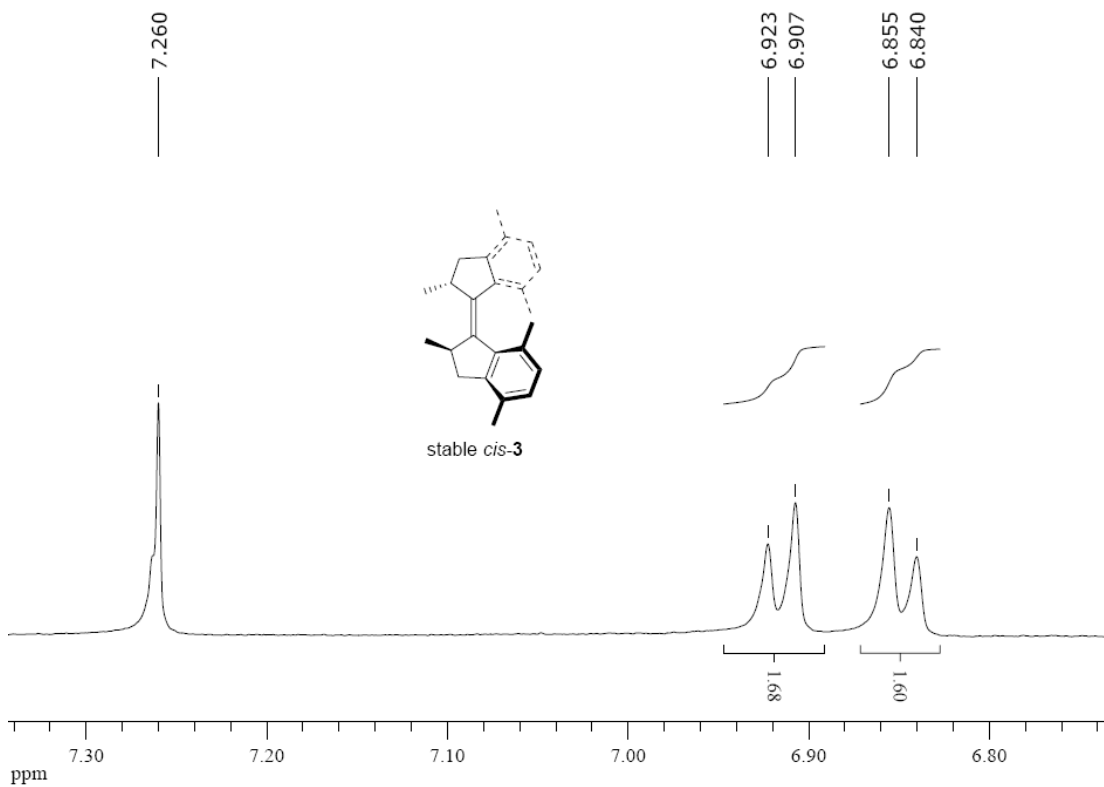

**Figure 3.** 500 MHz  $^1\text{H}$  NMR spectrum (expansion) of *stable cis-3* in  $\text{CDCl}_3$ .

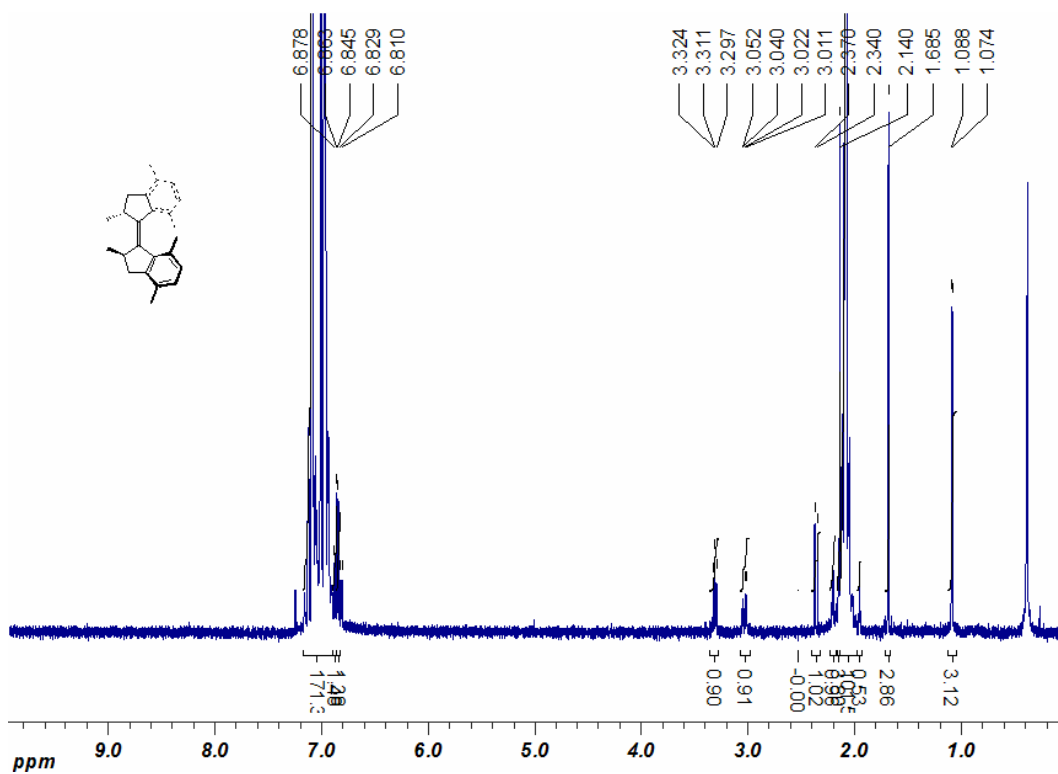

Figure 4.  $^1\text{H}$  NMR spectrum of *cis-3* in toluene- $\text{D}_8$ .

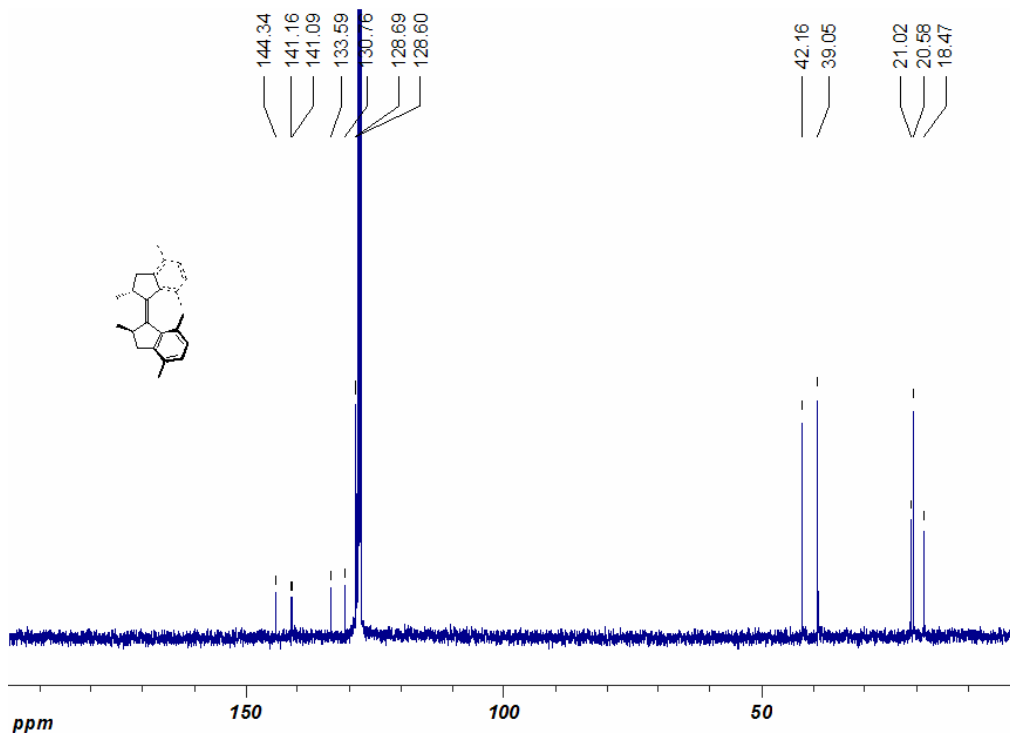

Figure 5.  $^{13}\text{C}$  NMR spectrum of *cis-3* in benzene- $\text{D}_6$ .

$^1\text{H}$  and  $^{13}\text{C}$  NMR spectra for stable *trans*-3

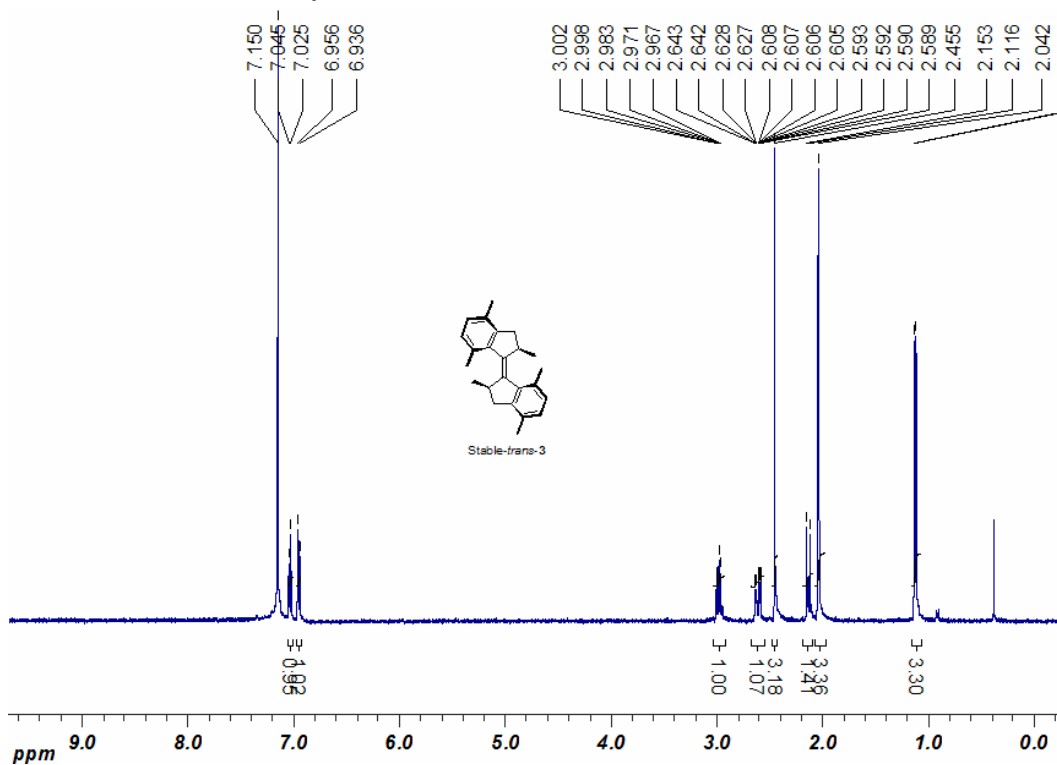

Figure 6.  $^1\text{H}$  NMR spectrum of *trans*-3 in  $\text{C}_6\text{D}_6$ .

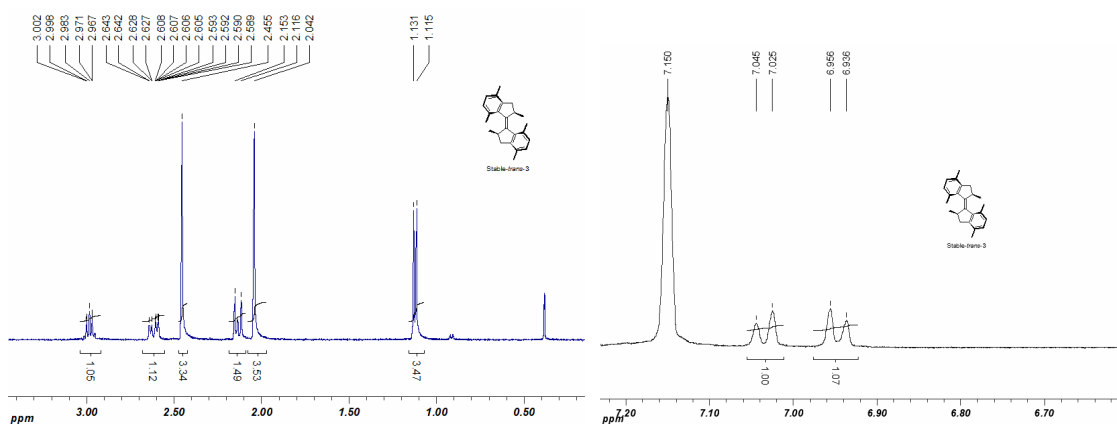

Figure 7. Expansions of  $^1\text{H}$  NMR spectrum of *trans*-3 in  $\text{C}_6\text{D}_6$ .

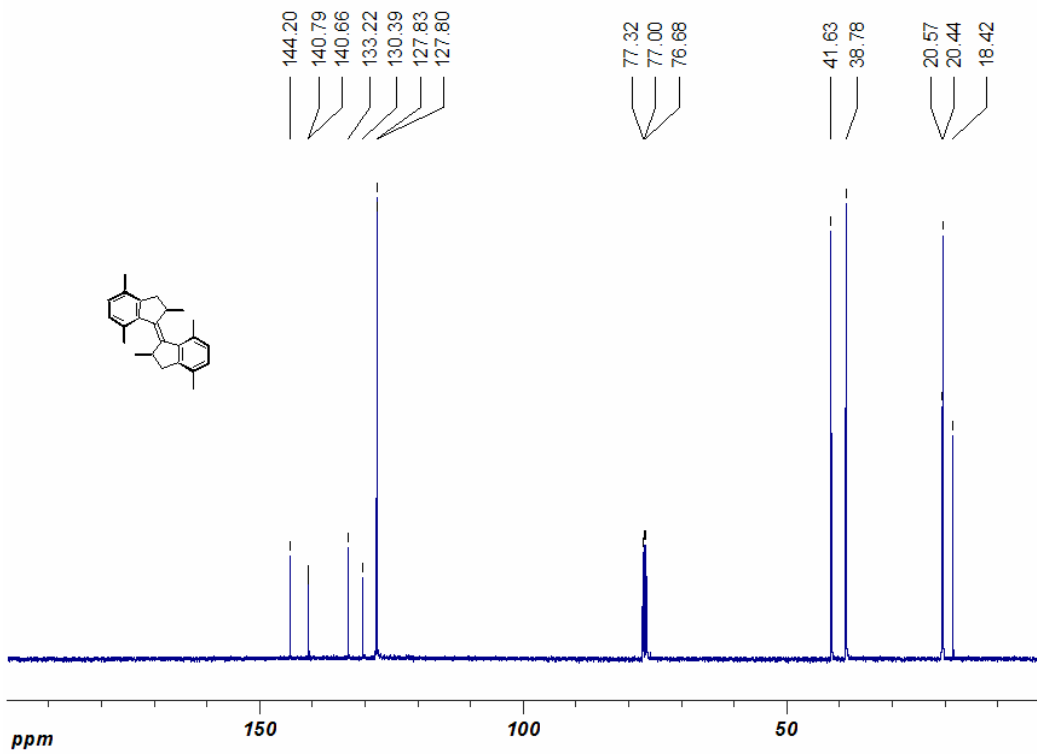

Figure 8.  $^{13}\text{C}$  NMR spectrum of *trans-3* in  $\text{CDCl}_3$ .

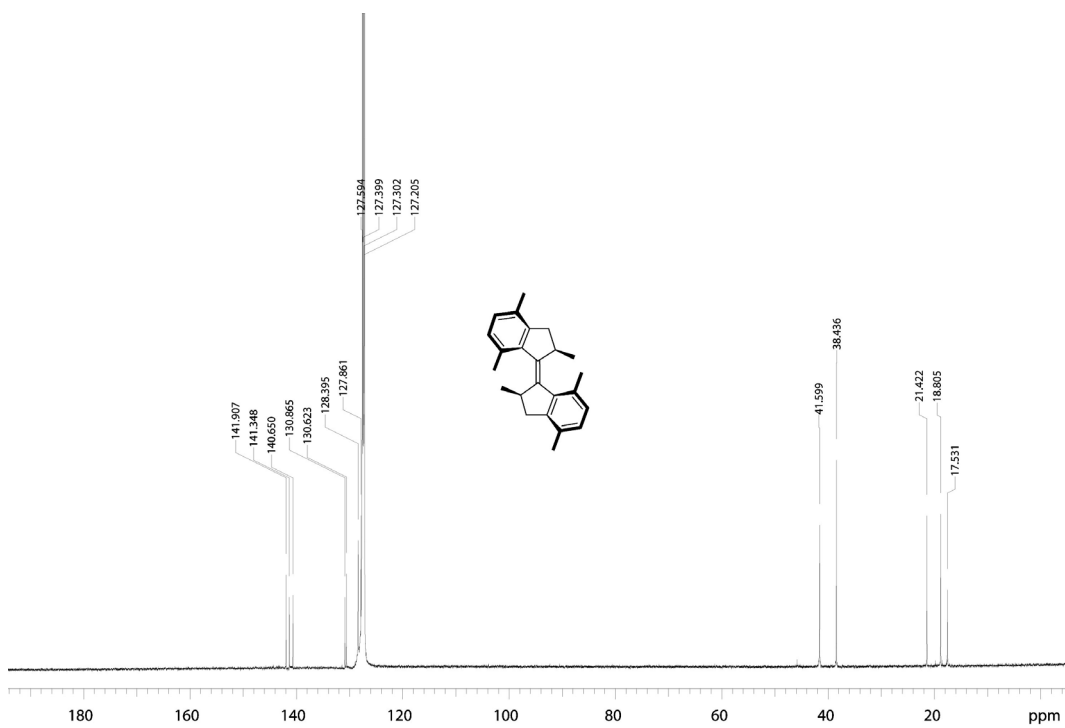

Figure 9.  $^{13}\text{C}$  NMR spectrum of *trans-3* in  $\text{C}_6\text{D}_6$ .

$^1\text{H}$  and  $^{13}\text{C}$  NMR spectra for stable **6**

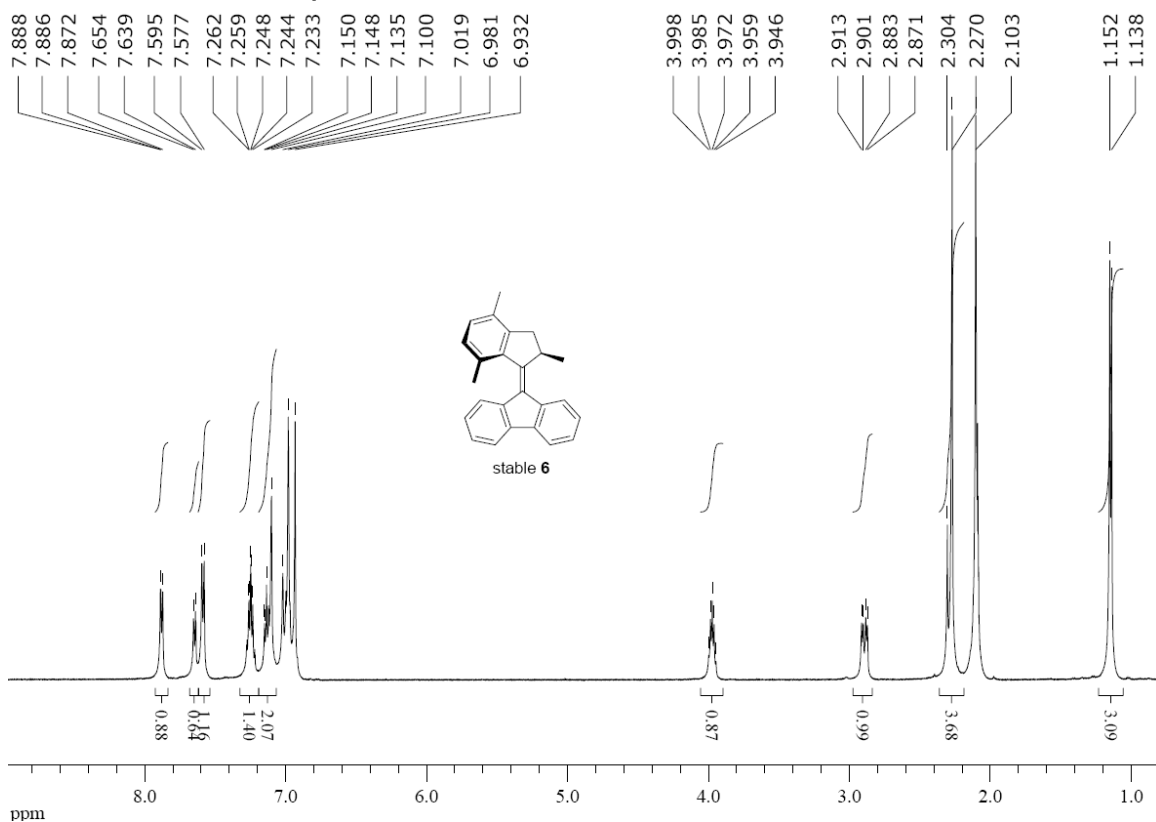

Figure 10. 500 MHz  $^1\text{H}$  NMR spectrum of stable **6** in toluene- $\text{D}_8$ .

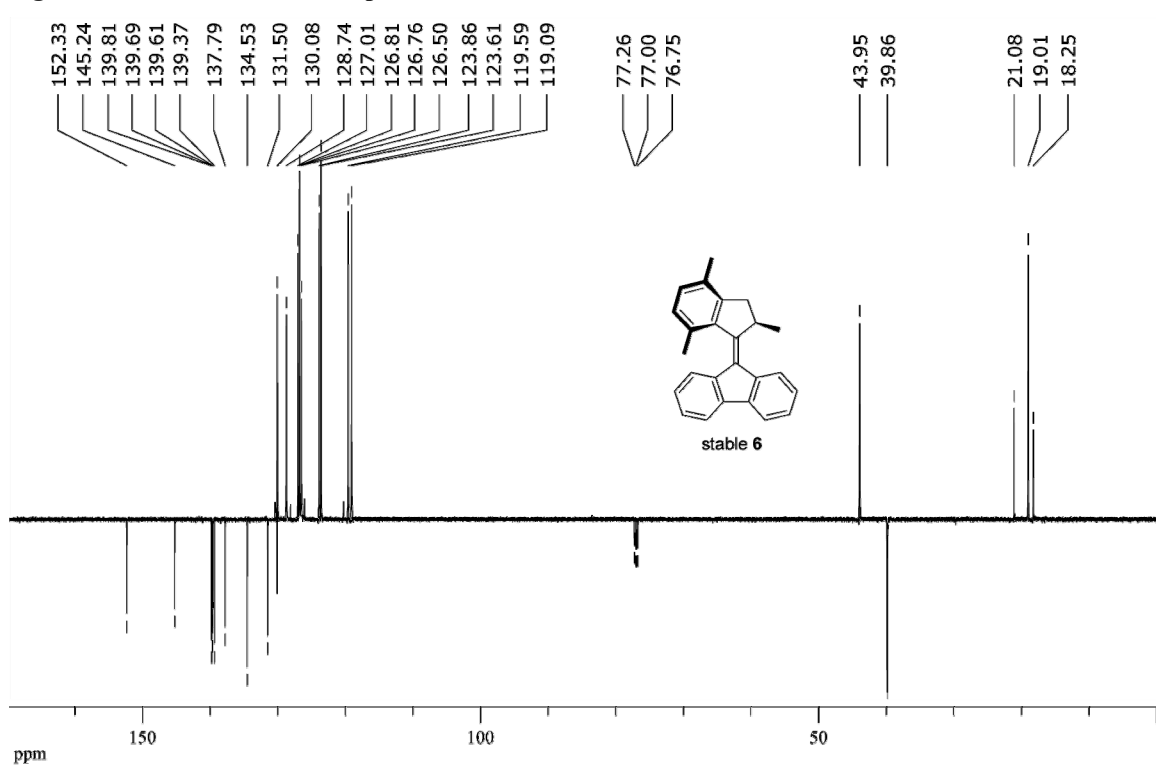

Figure 11. 100 MHz  $^{13}\text{C}$  NMR spectrum of stable **6** in  $\text{CDCl}_3$ .

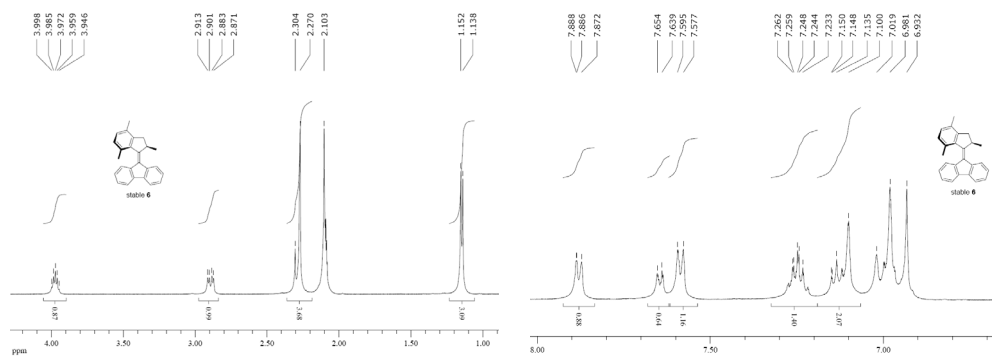

**Figure 12.** Expansion of 500 MHz  $^1\text{H}$  NMR spectrum of stable **6** in toluene- $d_8$ .

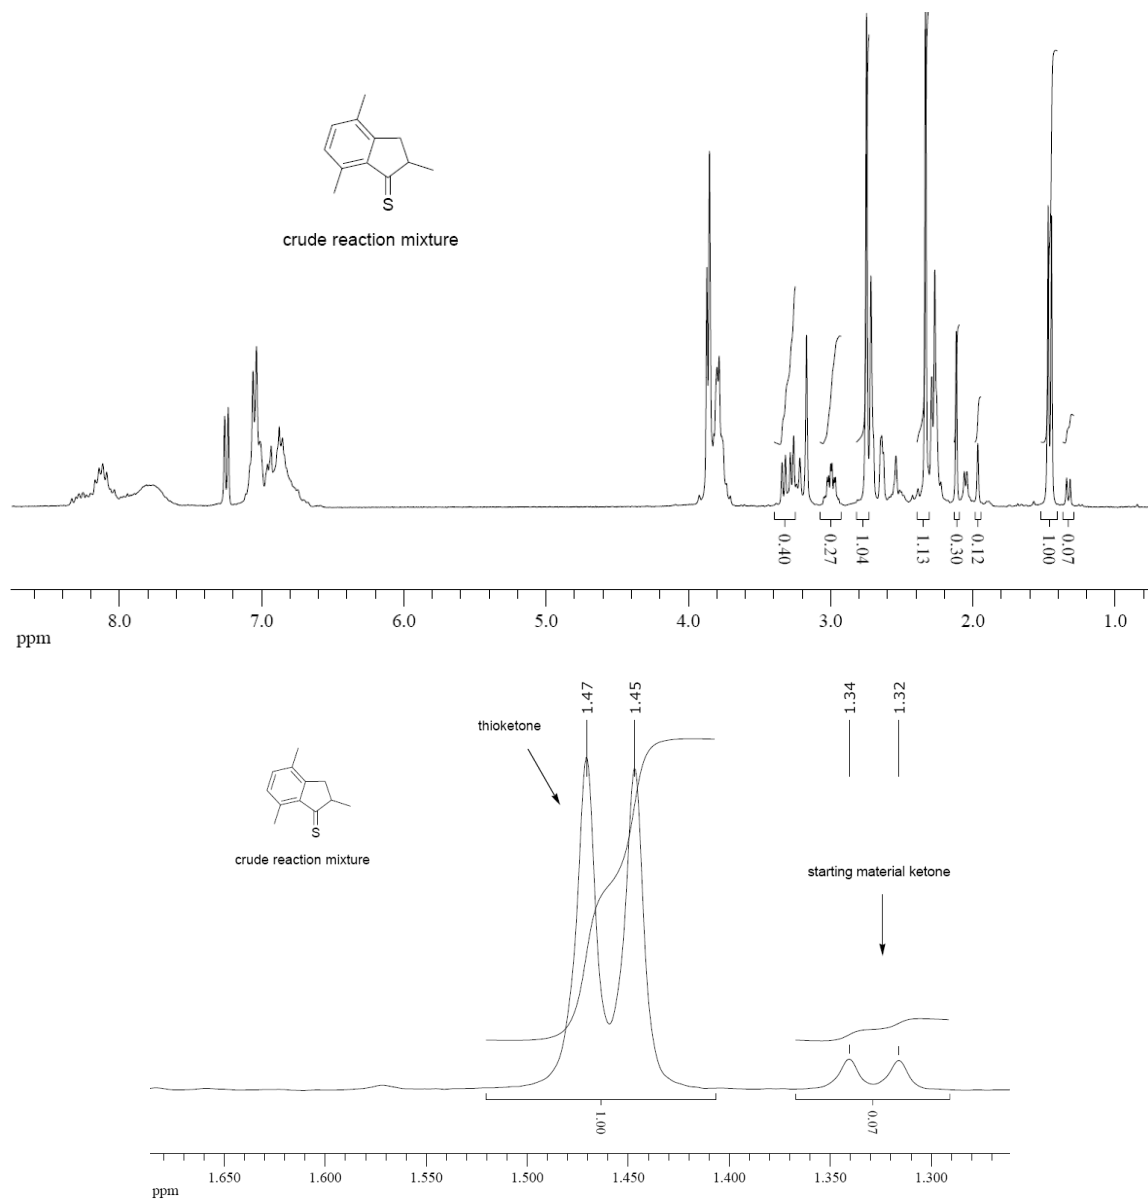

**Figure 13.** 400 MHz  $^1\text{H}$  NMR spectrum of crude thioketone **7** in  $\text{CDCl}_3$  (top) and expansion of the absorption from the stereogenic methyl groups of the starting material and product (bottom).

$^1\text{H}$  NMR spectra for PSS<sub>313nm</sub> of stable *cis*-3 and unstable *trans*-3

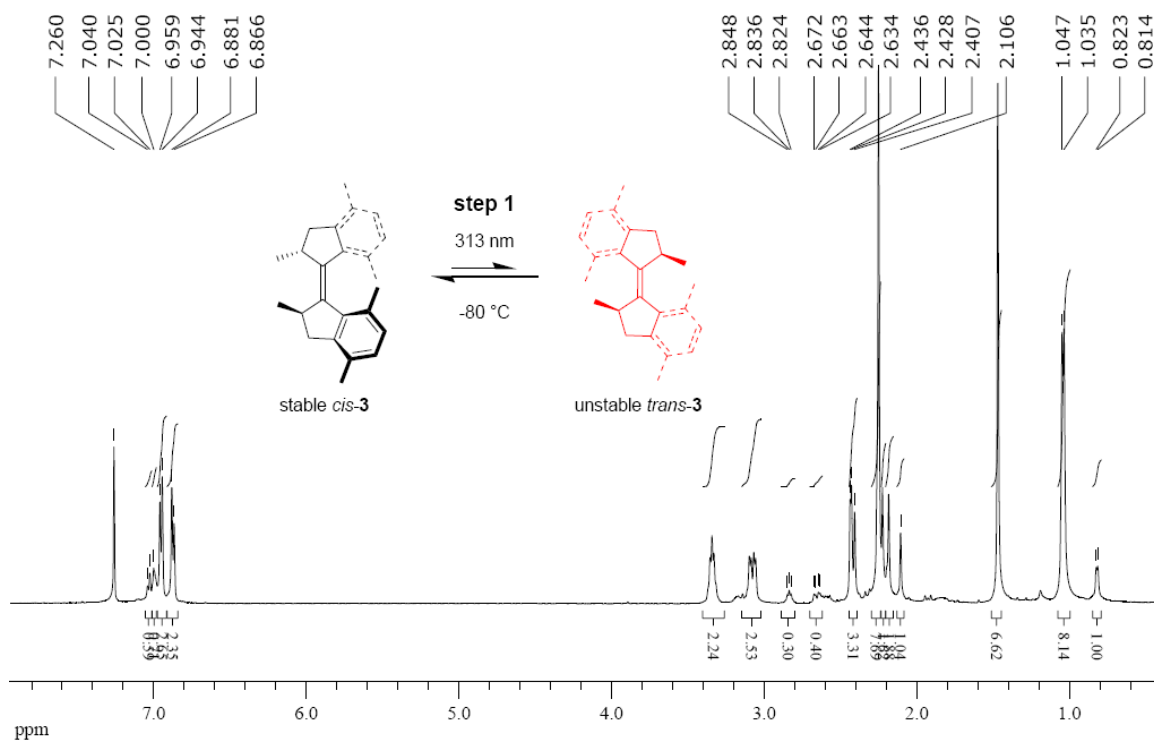

**Figure 14.**  $^1\text{H}$  NMR spectrum ( $-80^\circ\text{C}$ ) of PSS<sub>313</sub> of stable *cis*-3 and unstable *trans*-3 in  $\text{CDCl}_3$ . Some peaks have shifted slightly compared too the corresponding spectrum at rt.

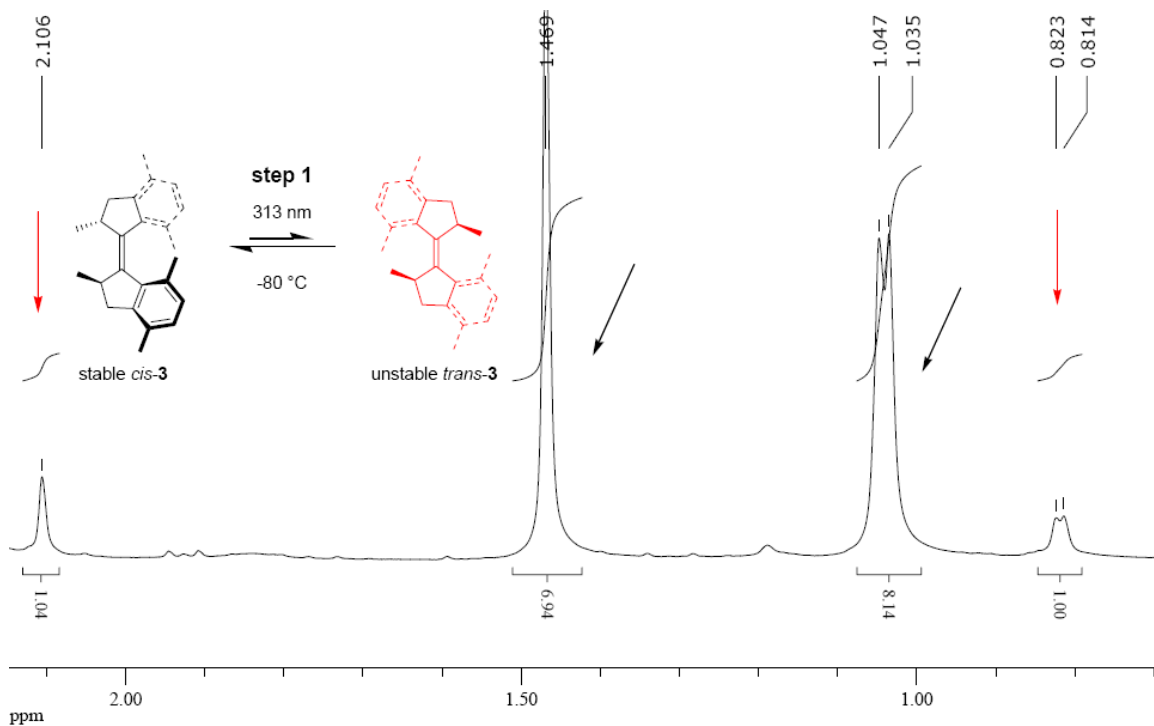

**Figure 15.**  $^1\text{H}$  NMR spectrum ( $-80^\circ\text{C}$ ) of PSS<sub>313</sub> of stable *cis*-3 and unstable *trans*-3 (expansion) in  $\text{CDCl}_3$ .



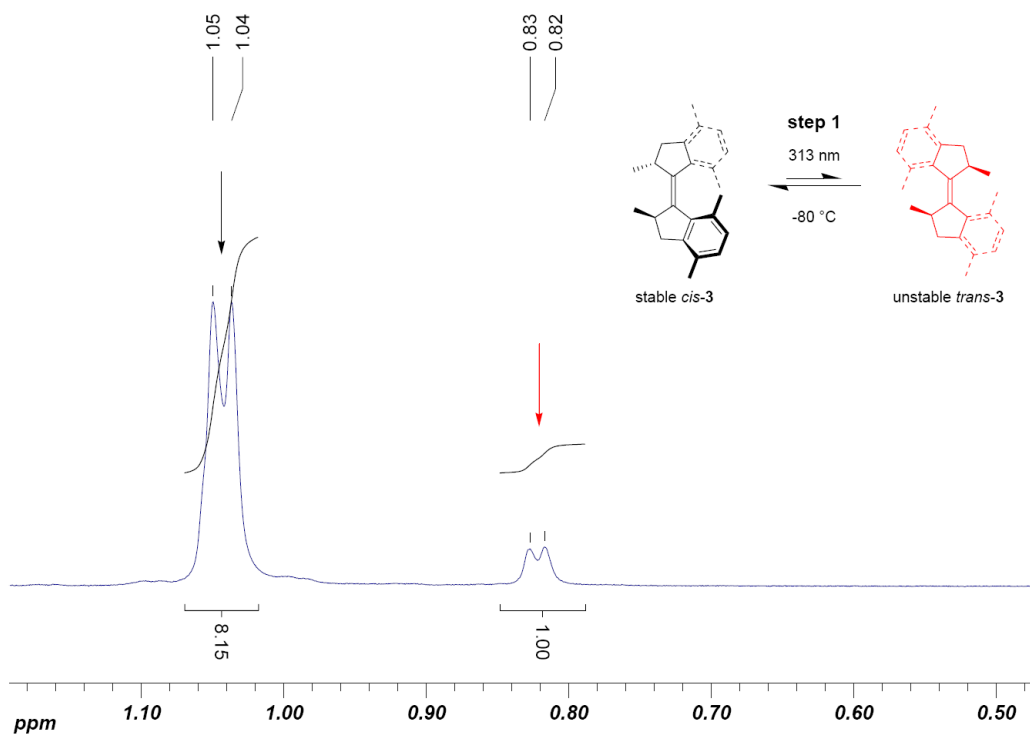

Figure 16.  $^1\text{H}$  NMR spectrum ( $-80^\circ\text{C}$ ) of PSS<sub>313</sub> of stable *cis*-3 and unstable *trans*-3 (expansion).

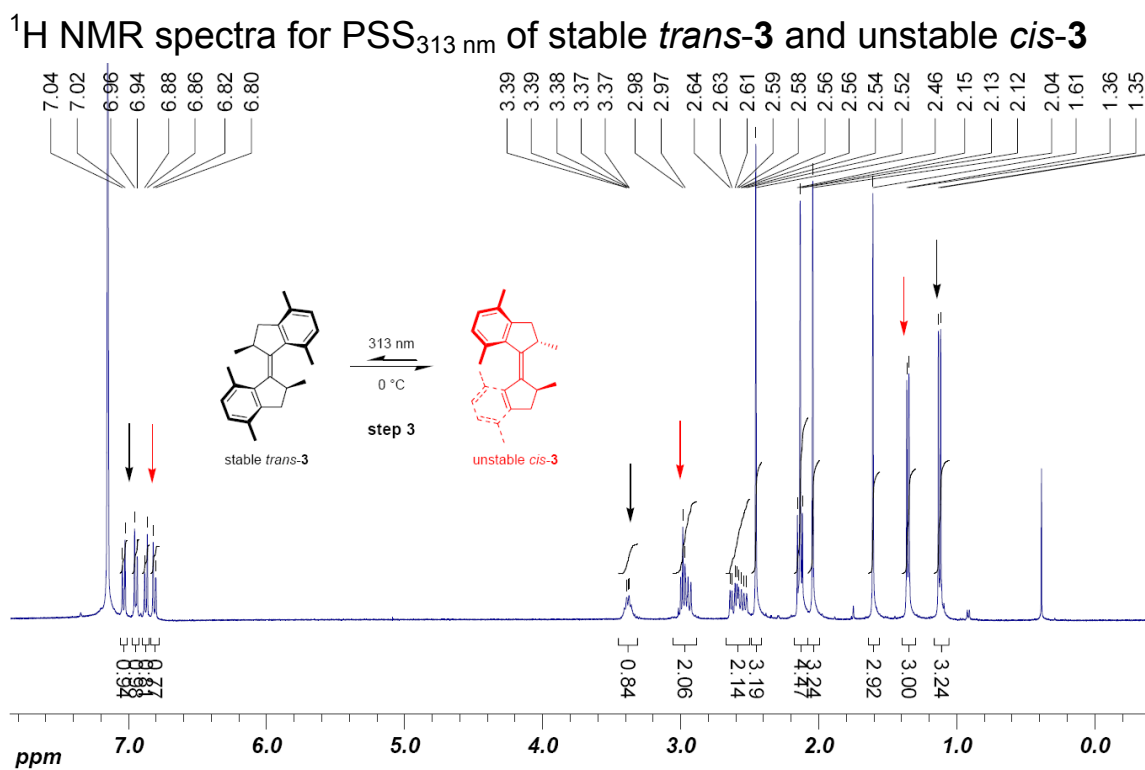

Figure 17.  $^1\text{H}$  NMR spectrum (400MHz, rt,  $\text{C}_6\text{D}_6$ ) of PSS<sub>313</sub> of stable *trans*-3 and unstable *cis*-3.

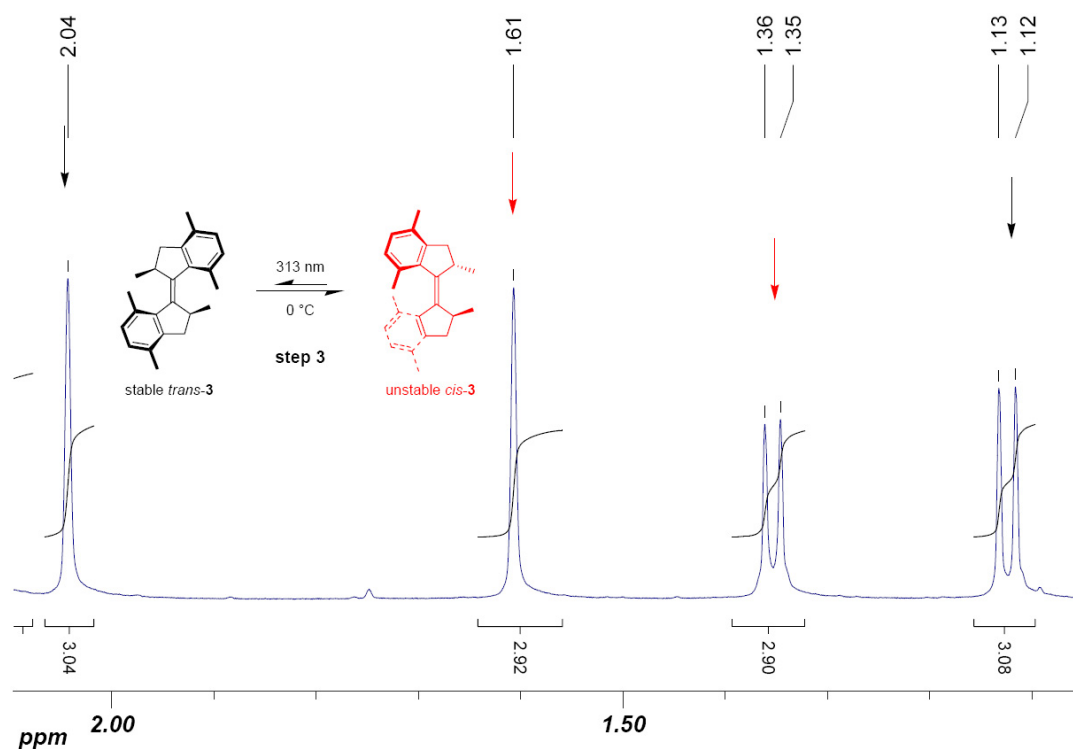

Figure 18.  $^1\text{H}$  NMR spectrum (rt,  $\text{C}_6\text{D}_6$ ) of PSS<sub>313</sub> of stable *trans*-3 and unstable *cis*-3 (expansion).

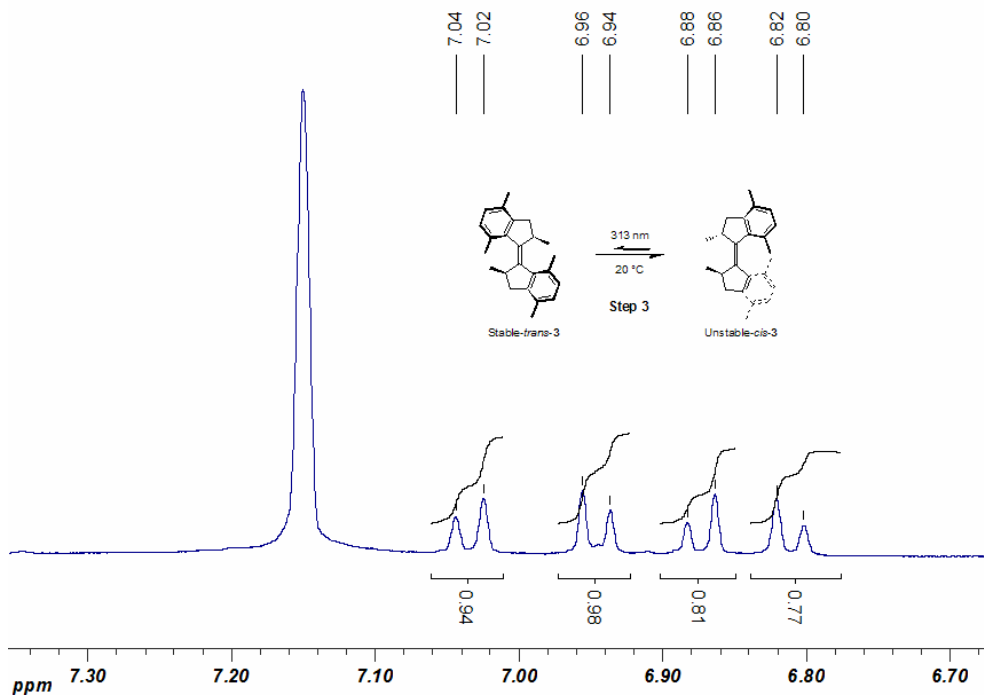

Figure 19.  $^1\text{H}$  NMR spectrum (rt,  $\text{C}_6\text{D}_6$ ) of PSS<sub>313</sub> of stable *trans*-3 and unstable *cis*-3 (expansion).

$^1\text{H}$  NMR (500 MHz) spectrum for PSS<sub>365nm</sub> containing stable **6** and unstable **6**

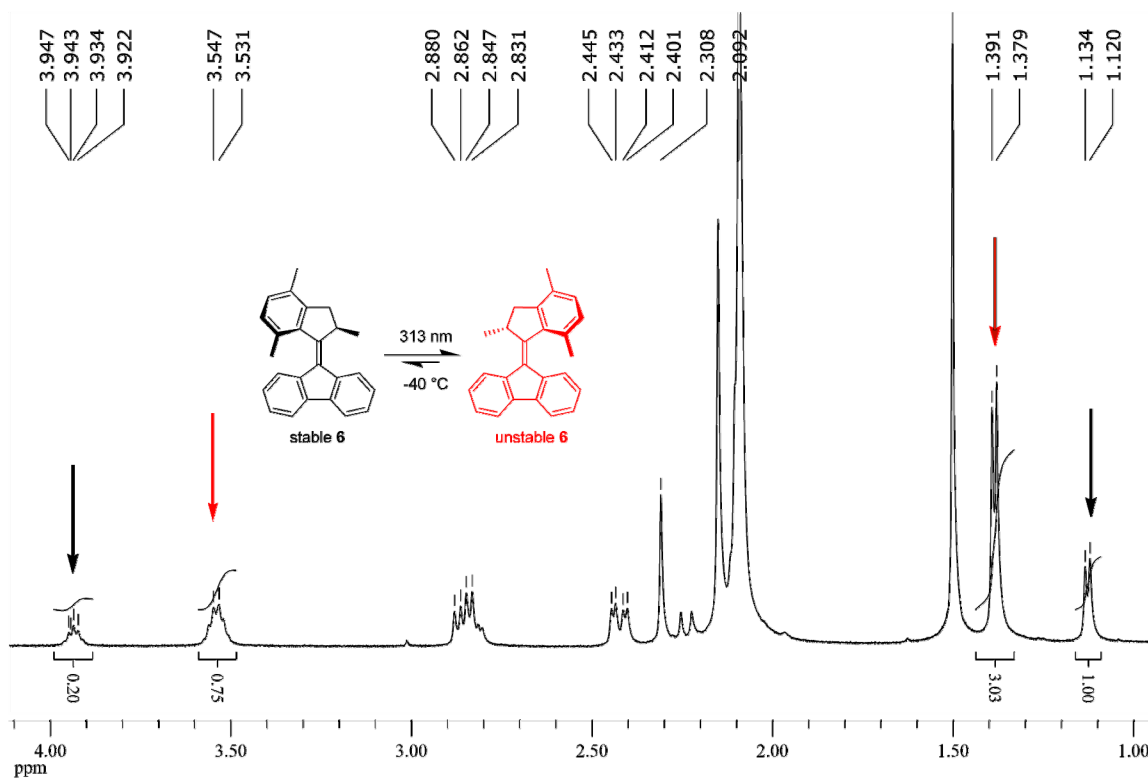

**Figure 20.** 500MHz  $^1\text{H}$  NMR spectrum (toluene-D<sub>8</sub>) of PSS (313 nm) of **6**, with black and red arrows indicating key absorptions of stable-**6** and unstable-**6**, respectively.
